# Supplementary material
Source: publisher figshare collection journal article supplement (https://tandf.figshare.com/ndownloader/files/17854844)
Supplement: Supplementary file 1 [file 17854844]

## **Issue yield, campaign communication, and electoral performance: a six-country comparative analysis**

Lorenzo De Sio and Till Weber

### **Online Appendix**

#### **(1) Issue areas for the multilevel model**

Abortion  
Corruption  
Crime  
Defence  
Democracy  
Drugs  
Economy  
Education  
Energy  
Environment  
Europe  
Euthanasia  
Health  
Housing  
Immigration  
Inequality  
Integration  
Labour  
Marriage  
Pensions  
Regionalism  
Socialization  
Taxes  
Terrorism  
Trade  
Women

#### **(2) Descriptive statistics for the variables used in the analyses**

| <i>Variable</i>       | <i>N</i> | <i>Mean</i> | <i>Std. dev.</i> | <i>Minimum</i> | <i>Maximum</i> |
|-----------------------|----------|-------------|------------------|----------------|----------------|
| Issue emphasis        | 1,206    | 0.038       | 0.072            | 0.000          | 0.816          |
| Issue yield           | 1,206    | 0.176       | 0.129            | -0.004         | 0.706          |
| Issue salience        | 1,206    | 0.692       | 0.119            | 0.404          | 0.933          |
| Electoral performance | 40       | 0.032       | 0.785            | -2.062         | 1.595          |
| Strategicness         | 40       | 0.736       | 0.328            | -0.458         | 1.512          |
| Riding-the-wave       | 40       | 0.342       | 0.410            | -0.470         | 2.120          |

(3) Positional and valence goals tested in the six countries (English translations)

**Austria**

| Type       | Goal A                                                                    | Goal B                                                                        |
|------------|---------------------------------------------------------------------------|-------------------------------------------------------------------------------|
| Positional | Require foreigners in Austria to fully adapt to Austrian culture          | Allow foreigners in Austria to preserve their own culture                     |
| Positional | Make asylum rules more restrictive                                        | Keep current asylum rules                                                     |
| Positional | Diesel cars should be banned                                              | No cars should be banned                                                      |
| Positional | Introduce stronger direct democracy measures                              | Keep current level of direct democracy measures                               |
| Positional | Stay in the EU                                                            | Leave the EU                                                                  |
| Positional | End freedom of movement of people from the EU into Austria                | Allow freedom of movement of people from the EU into Austria                  |
| Positional | Allow gay marriages                                                       | Do not allow gay marriages                                                    |
| Positional | Politics should implement gender quotas                                   | Politics should not enforce gender quotas                                     |
| Positional | Reduce income differences                                                 | Do not reduce income differences                                              |
| Positional | Deregulate the job market                                                 | Keep current regulations in the job market                                    |
| Positional | Increase the minimum wage above 1500 euros                                | Do not increase the minimum wage above 1500 euros                             |
| Positional | Keep current pension age                                                  | Increase pension age                                                          |
| Positional | Austria should have a property tax on inheritance                         | Austria should not have a property tax on inheritance                         |
| Positional | The EU has to enforce refugee quotas in all member states                 | Each member state of the EU should decide by its own on refugee quotas        |
| Positional | Austria should introduce a comprehensive school for all children until 14 | Austria should not introduce a comprehensive school for all children until 14 |
| Positional | Raise taxes and spend more on health and social services                  | Cut taxes and spend less on health and social services                        |
| Positional | Surveillance measures should be extended                                  | Surveillance measures should not be extended                                  |
| Positional | Promoting the production of sustainable energy                            | Maintaining the current mix of sustainable and fossil energy                  |
| Positional | Austria should abolish the obligatory membership in trade associations    | Austria should not abolish the obligatory membership in trade associations    |
| Positional | Fight unemployment even at the expense of high national debt              | Don't decrease unemployment if it means higher national debt                  |
| Positional | Restrict access to welfare benefits for immigrants                        | Maintain current levels of access to welfare benefits for immigrants          |
| Valence    | Fight corruption                                                          |                                                                               |
| Valence    | Fight crime and keep our communities safe                                 |                                                                               |
| Valence    | Support economic growth                                                   |                                                                               |
| Valence    | Protect the environment                                                   |                                                                               |
| Valence    | Providing affordable homes                                                |                                                                               |
| Valence    | Control immigration                                                       |                                                                               |
| Valence    | Fighting poverty of Elderly People                                        |                                                                               |
| Valence    | Providing Social Justice                                                  |                                                                               |
| Valence    | Protect Austria against terrorist attacks                                 |                                                                               |
| Valence    | Fight unemployment                                                        |                                                                               |

**Germany**

| Type       | Goal A                                                                           | Goal B                                                                    |
|------------|----------------------------------------------------------------------------------|---------------------------------------------------------------------------|
| Positional | The current budget surplus should be used for reducing taxes                     | The current budget surplus should be used in infrastructure and education |
| Positional | Diesel cars should be banned                                                     | No cars should be banned                                                  |
| Positional | Keep the decision of nuclear power phase-out                                     | Withdraw the decision of nuclear power phase-out                          |
| Positional | Building more wind turbines                                                      | Stop building wind turbines                                               |
| Positional | Stay in the EU                                                                   | Leave the EU                                                              |
| Positional | The EU has to enforce refugee quotas in all member states                        | Each member state of the EU should decide by its own on refugee quotas    |
| Positional | In order to maintain the EURO, Germany should transfer money to poorer countries | Germany should not pay any money to poorer countries within the EURO zone |
| Positional | Repeal gay marriages                                                             | Keep gay marriages                                                        |
| Positional | Make immigration rules more restrictive                                          | Keep current immigration rules                                            |
| Positional | Reduce income differences                                                        | Do not reduce income differences                                          |
| Positional | Require foreigners in Germany to fully adapt to national culture                 | Allow foreigners in Germany to preserve their own culture                 |
| Positional | Deregulate the job market                                                        | Keep current regulations in the job market                                |
| Positional | Increase pension age                                                             | Keep current pension age                                                  |
| Positional | Politics should implement gender quotas                                          | Politics should not enforce gender quotas                                 |
| Positional | Introduce possibilities for binding referenda                                    | Don't introduce binding referenda                                         |
| Positional | Limit the number of refugees                                                     | Accept more refugees                                                      |
| Positional | Minimal wages should be increased to a minimum of 10 EUR                         | Minimal wages should be abolished                                         |
| Valence    | Fighting crime                                                                   |                                                                           |
| Valence    | Protect the environment                                                          |                                                                           |
| Valence    | Support for families and children                                                |                                                                           |
| Valence    | Support the economic growth                                                      |                                                                           |
| Valence    | Providing affordable homes                                                       |                                                                           |
| Valence    | Maintaining infrastructure                                                       |                                                                           |
| Valence    | Fighting poverty of elderly                                                      |                                                                           |
| Valence    | Providing social justice                                                         |                                                                           |
| Valence    | Protect from terrorism                                                           |                                                                           |
| Valence    | Fight unemployment                                                               |                                                                           |

**France**

| Type       | Goal A                                      | Goal B                                     |
|------------|---------------------------------------------|--------------------------------------------|
| Positional | Deregulate the job market                   | Keep current regulations in the job market |
| Positional | Repeal gay marriages                        | Keep gay marriages                         |
| Positional | Legalise soft drugs                         | Keep soft drugs illegal                    |
| Positional | Keep current immigration rules              | Make immigration rules more restrictive    |
| Positional | Restrict welfare for immigrants             | Keep welfare for immigrants                |
| Positional | Accept more refugees                        | Limit the number of refugees               |
| Positional | Forbid Islamic veil in public spaces        | Authorise Islamic veil in public spaces    |
| Positional | Lower pension age                           | Increase pension age                       |
| Positional | Reduce income differences                   | Don't reduce income differences            |
| Positional | Limit economic globalisation                | Encourage economic globalisation           |
| Positional | Stay in the EU                              | Leave the EU                               |
| Positional | Leave the Euro                              | Stay in the Euro                           |
| Positional | Abandon nuclear energy                      | Keep using nuclear energy                  |
| Positional | Restrict access to abortion                 | Keep access to abortion                    |
| Positional | Legalise euthanasia                         | Keep euthanasia illegal                    |
| Valence    | Make France count more in Europe            |                                            |
| Valence    | Make EU more democratic                     |                                            |
| Valence    | Support economic growth                     |                                            |
| Valence    | Fight corruption                            |                                            |
| Valence    | Protect the environment                     |                                            |
| Valence    | Protect France from the terrorist threat    |                                            |
| Valence    | Make women's role in society more important |                                            |
| Valence    | Fight unemployment                          |                                            |
| Valence    | Improve the quality of education            |                                            |

## Italy

| Type       | Goal A                                                                           | Goal B                                                                           |
|------------|----------------------------------------------------------------------------------|----------------------------------------------------------------------------------|
| Positional | Leave the European Union                                                         | Keep Italy in the European Union                                                 |
| Positional | Make the EU economic policies more flexible                                      | Maintain the EU economic austerity                                               |
| Positional | Keep soft drugs illegal                                                          | Legalize soft drugs                                                              |
| Positional | Stay in the Euro                                                                 | Leave the Euro                                                                   |
| Positional | Intensify the fight against tax evasion                                          | Do not intensify the fight against tax evasion                                   |
| Positional | Increase economic bonuses to families with children                              | Do not increase economic bonuses to families with children                       |
| Positional | Maintain progressive taxation on income (who earns more has a higher tax burden) | Introduce a flat tax (pre-fixed % of income tax, regardless of the income)       |
| Positional | Maintain same-sex unions                                                         | Abolish same-sex unions                                                          |
| Positional | Limit economic globalization                                                     | Promote economic globalization                                                   |
| Positional | Make the citizenship to regular immigrants' sons easier                          | Maintain the current legislation on immigrants' citizenship                      |
| Positional | Decriminalize the excess of legitimate defenses                                  | Maintain the current legislation on the excess of legitimate defense             |
| Positional | Deregulate the job market, making firing workers less costly for firms           | Keep current regulations in the job market, making more difficult for firms to f |
| Positional | Keep current pension age                                                         | Reduce pension age                                                               |
| Positional | Legalise and regulate prostitution                                               | Keep the current norms on prostitution                                           |
| Positional | Introduce a basic income for those living under the poverty line                 | Do not introduce a basic income for those living under the poverty line          |
| Positional | Reduce income differences                                                        | Do not reduce income differences                                                 |
| Positional | Limit the number of refugees                                                     | Keep accepting refugees like now                                                 |
| Positional | Do not introduce the hourly minimum wage                                         | Introduce the hourly minimum wage                                                |
| Positional | Scrap the cost of university tuition fees                                        | Maintain the present cost of university tuition fees                             |
| Positional | Abolish the current legislation on the End-of-life                               | Keep the current legislation on the End-of-life                                  |
| Positional | Maintain mandatory requirements for vaccines                                     | Abolish mandatory requirements for vaccines                                      |
| Positional | Maintain the current levels of access to welfare benefits for immigrants         | Reduce access to welfare benefits for immigrants                                 |
| Valence    | Make Italy count more in Europe                                                  |                                                                                  |
| Valence    | Fight corruption                                                                 |                                                                                  |
| Valence    | Reduce the costs of politics                                                     |                                                                                  |
| Valence    | Boost economic growth                                                            |                                                                                  |
| Valence    | Make citizens safer from crime                                                   |                                                                                  |
| Valence    | Fight unemployment                                                               |                                                                                  |
| Valence    | Fight pollution and land disruption                                              |                                                                                  |
| Valence    | Fight poverty                                                                    |                                                                                  |
| Valence    | Renew Italian politics                                                           |                                                                                  |
| Valence    | Ensure a well-functioning healthcare                                             |                                                                                  |
| Valence    | Improve the education system                                                     |                                                                                  |
| Valence    | Protect Italy from the terrorist threat                                          |                                                                                  |

## Netherlands

| Type       | Goal A                                                                          | Goal B                                                                           |
|------------|---------------------------------------------------------------------------------|----------------------------------------------------------------------------------|
| Positional | Require employees to give employers a fixed term contract after two years       | Do not require employees to give employers a fixed term contract after two years |
| Positional | Allow foreigners in The Netherlands to preserve their own culture               | Require foreigners in The Netherlands to fully adapt to Dutch culture            |
| Positional | Abolish the deductible in health insurance, even if this means higher fees      | Do not abolish the deductible in health insurance                                |
| Positional | Increase defense spending, to come closer to the NATO norm                      | Do not increase defense spending                                                 |
| Positional | The Netherlands should leave the EU                                             | The Netherlands should stay in the EU                                            |
| Positional | Completely close the Dutch borders to immigrants                                | Do not completely close the Dutch borders to immigrants                          |
| Positional | Reduce income differences                                                       | Do not reduce income differences                                                 |
| Positional | Allow elderly to be assisted in ending their life                               | Do not allow elderly to be assisted in ending their life                         |
| Positional | Increase the tax on meat to the 21% tariff                                      | Do not increase the tax on meat                                                  |
| Positional | Reduce the pension age to 65                                                    | Keep the pension age at 67                                                       |
| Positional | Introduce possibilities for binding referenda                                   | Only keep the current possibilities for non binding referenda                    |
| Positional | Maintain the current refugee policy in The Netherlands                          | Take in less refugees in The Netherlands                                         |
| Positional | Abolish the student loans and bring back the student scholarship                | Maintain the student loans and do not bring back the student scholarship         |
| Positional | Maintain the current weed policy                                                | Legalise the selling and growing of weed                                         |
| Positional | Maintain the right to social provisions for Dutch residents without citizenship | Restrict the right to social provisions to Dutch nationals only                  |
| Valence    | Improve care for the elderly and the disabled                                   |                                                                                  |
| Valence    | Maintain the current economic growth                                            |                                                                                  |
| Valence    | Fight environmental pollution                                                   |                                                                                  |
| Valence    | Protect the Netherlands against terrorist attacks                               |                                                                                  |
| Valence    | Further reduce unemployment                                                     |                                                                                  |

## United Kingdom

| Type       | Goal A                                                          | Goal B                                                               |
|------------|-----------------------------------------------------------------|----------------------------------------------------------------------|
| Positional | Keep Britain in the European Single Market                      | Leave the European Single Market                                     |
| Positional | Keep Britain in the European Union                              | Leave the European Union                                             |
| Positional | Allow Scotland to vote in another referendum on independence    | Do not allow Scotland to vote in another referendum on independence  |
| Positional | Maintain Britain's nuclear weapons (Trident)                    | Dismantle Britain's nuclear weapons (Trident)                        |
| Positional | Invest more public money to build affordable homes              | Rely on the private sector to build affordable homes                 |
| Positional | Require foreigners in Britain to fully adapt to British culture | Allow foreigners in Britain to preserve their own culture            |
| Positional | Allow the expansion of fracking to produce more oil and gas     | Prohibit the use of fracking to produce more oil and gas             |
| Positional | End freedom of movement of people from the EU into Britain      | Allow freedom of movement of people from the EU into Britain         |
| Positional | Keep the law that allows gay marriages                          | Repeal the law that allows gay marriages                             |
| Positional | Expand the provision of grammar schools                         | Limit the provision of grammar schools                               |
| Positional | Reduce income differences                                       | Do not reduce income differences                                     |
| Positional | Increase the minimum wage                                       | Do not increase the minimum wage                                     |
| Positional | Nationalize Britain's railways                                  | Keep Britain's railways in private                                   |
| Positional | Cut taxes and spend less on health and social services          | Raise taxes and spend more on health and social services             |
| Positional | Scrap or reduce the cost of university tuition fees             | Maintain the present cost of university tuition fees                 |
| Positional | Ban the Islamic veil in public spaces                           | Allow the Islamic veil in public spaces                              |
| Positional | Restrict access to welfare benefits for immigrants              | Maintain current levels of access to welfare benefits for immigrants |
| Positional | Ban zero hours contracts for workers                            |                                                                      |
| Valence    | Improve the NHS                                                 |                                                                      |
| Valence    | Fight crime and keep our communities safe                       |                                                                      |
| Valence    | Protect the environment                                         |                                                                      |
| Valence    | Boost economic growth                                           |                                                                      |
| Valence    | Control immigration                                             |                                                                      |
| Valence    | Provide leadership for the country                              |                                                                      |
| Valence    | Protect pensions                                                |                                                                      |
| Valence    | Improve the quality of schools                                  |                                                                      |
| Valence    | Protect the UK from terrorist attacks                           |                                                                      |
| Valence    | Reduce unemployment                                             |                                                                      |
